# Supplementary material
Source: publisher site journal article supplement (https://www.dovepress.com/article/329454)
Supplement: Supplementary file 1 [file get_supplementary_file.php]

**Sensitivity analyses result.**

**Supplemental material Table 1.**

**Medication adherence rate**

|  | **Non-P4P**  **(N=7144, 50.0%)** | **P4P**  **(N=7144, 50.0%)** |  |
| --- | --- | --- | --- |
|  | **N (%)** | **N (%)** | **p-value** |
| **Medication adherence rate** |  |  |  |
| MPR ≥ 80% | 1529 (21.4%) | 2486 (34.8%) | 0.0041 |
| MPR < 80% | 5615 (78.6%) | 4658 (65.2%) |

Abbreviations. MPR: medication possession ratio; P4P, pay-for-performance

Good medication adherence was classified as an MPR ≥80% and non-adherence as an MPR < 80%

**Supplemental material Table 2. Number of patients and proportion of the outcome variables (COPD-related ED visits, COPD-related hospitalizations, and COPD-related ICU admissions). And the DID analysis results for the effects of the COPD P4P program with GEE model.**

| **Indicator** | **1-year before study enrollment**  **N (%)** | **1-year after study enrollment**  **N (%)** | **β (SE)** | ***p*-Value** | **95% CI** |
| --- | --- | --- | --- | --- | --- |
| **ED visit** | | | | | |
| P4P | 1999 (25.63%) | 1946 (24.96%) | -0.138 (0.046) | -0.228 to -0.048 | 0.003 |
| Non-P4P | 1492 (19.13%) | 1637 (20.99%) |
| **Hospitalization** | | | | | |
| P4P | 1548 (19.85%) | 1513 (19.40%) | -0.129 (0.051) | -0.238 to -0.029 | 0.012 |
| Non-P4P | 1006 (13.67%) | 1148 (14.72%) |
| **ICU admission** | | | | | |
| P4P | 233 (2.99%) | 343 (4.40%) | -0.066 (0.115) | -0.291 to 0.160 | 0.568 |
| Non-P4P | 194 (2.49%) | 281 (3.60%) |

Patients in the P4P group were matched at a ratio of 1:1 based on age, gender, region, accreditation level, and CCI was done to create the non-P4P group.

Abbreviations. COPD: Chronic Obstructive Pulmonary Disease; DID: difference-in-difference; ED: Emergency department; GEE, generalized estimating equation; ICU: Intensive care unit; P4P, pay-for-performance; SE: standard error; 95% CI, 95% confidence interval.

**Supplemental material Table 3. Number of patients and proportion of the outcome variables (COPD-related ED visits, COPD-related hospitalizations, and COPD-related ICU admissions). And the DID analysis results for the effects of the COPD P4P program with GEE model.**

| **Indicator** | **1-year before study enrollment**  **N (%)** | **1-year after study enrollment**  **N (%)** | **β (SE)** | ***p*-Value** | **95% CI** |
| --- | --- | --- | --- | --- | --- |
| **ED visit** | | | | | |
| P4P | 1819 (25.46 %) | 1779 (24.90 %) | -0.298 (0.033) | <.0001 | -0.459 to -0.138 |
| Non-P4P | 1383 (19.36 %) | 1556 (21.78 %) |
| **Hospitalization** | | | | | |
| P4P | 1421 (19.89 %) | 1395 (19.53 %) | -0.210 (0.036) | 0.023 | -0.390 to -0.030 |
| Non-P4P | 1021 (14.29 %) | 1111 (15.55 %) |
| **ICU admission** | | | | | |
| P4P | 218 (3.05 %) | 311 (4.35 %) | 0.0167 (0.064) | 0.920 | -0.308 to 0.341 |
| Non-P4P | 185 (2.59 %) | 265 (3.71 %) |

Patients in the P4P group were matched at a ratio of 1:1 based on age, gender, region, accreditation level, CCI, and bronchodilators was done to create the non-P4P group. Adjust for exacerbations history in previous year.

Abbreviations. COPD: Chronic Obstructive Pulmonary Disease; DID: difference-in-difference; ED: Emergency department; GEE, generalized estimating equation; ICU: Intensive care unit; P4P, pay-for-performance; SE: standard error; 95% CI, 95% confidence interval.
